# Structural basis of ligand selectivity by a bacterial adhesin lectin involved in multi- species biofilm formation

Shuaiqi Guo<sup>1</sup>, Tyler D.R. Vance<sup>1#</sup>, Hossein Zahiri<sup>1</sup>, Robert Eves<sup>1</sup>, Corey Stevens<sup>1¶</sup>, Jan-Hendrik Hehemann<sup>2</sup>, Silvia Vidal-Melgosa<sup>2</sup>, Peter L. Davies<sup>1\*</sup>

<sup>1</sup>Department of Biomedical and Molecular Sciences, Queen's University, Kingston, ON Canada K7L 3N6.

<sup>2</sup>Max Planck Institute for Marine Microbiology, 28359 Bremen, Germany.

<sup>#</sup>Author present address: Department of Laboratory Medicine and Pathobiology, University of Toronto, Toronto, ON Canada, M5S 1A8.

<sup>¶</sup>Author present address: Laboratoire des Polymères, Institut des Matériaux and Institut des Sciences et Ingénierie Chimiques, École Polytechnique Fédérale de Lausanne (EPFL), Batiment MXD, Station 12, 1015 Lausanne, Switzerland.

\*Corresponding author: Peter L. Davies, 613-533-2983

Email: [daviesp@queensu.ca](mailto:daviesp@queensu.ca)

## Classification

Major: Biological Sciences

Minor: Biochemistry, Biophysics and Computational Biology, Microbiology, Medical Sciences

## Keywords

Lectin-carbohydrate interactions, bacterial colonization and infection, multi-species biofilms, Repeats-In-Toxin adhesins, structural biology

## Abstract

Carbohydrate recognition by lectins governs critical host-microbe interactions. *MpPA14* lectin is a domain of a 1.5-MDa adhesin responsible for a symbiotic bacterium-diatom interaction in Antarctica. Here we show *MpPA14* binds various monosaccharides, with L-fucose and N-acetyl glucosamine being the strongest ligands ( $K_d \sim 150 \mu\text{M}$ ). High-resolution structures of *MpPA14* with 15 different sugars bound elucidated the molecular basis for the lectin's apparent binding promiscuity but underlying selectivity. *MpPA14* mediates strong  $\text{Ca}^{2+}$ -dependent interactions with the 3, 4 diols of L-fucopyranose and glucopyranoses, and binds other sugars via their specific minor isomers. Thus, *MpPA14* only binds polysaccharides like branched glucans and fucoidans with these free end-groups. Consistent with our findings, adhesion of *MpPA14* to diatom cells was selectively blocked by L-fucose, but not by N-acetyl galactosamine. With *MpPA14* lectin homologs present in adhesins of several pathogens, our work gives insight into an anti-adhesion strategy to block infection via ligand-based antagonists.

## Introduction

Carbohydrate-based polymers (glycans) are abundant on the exterior of cells(1, 2). The recognition of glycans by carbohydrate-binding proteins or lectins, underlies many essential biological events such as fertilization, immunological responses, cell-to-cell communications, and host-pathogen interactions(3-9). Some lectins are components of larger adhesion proteins (adhesins), which are key virulence factors that mediate the attachment of bacteria to host cells and other surfaces(6, 10-12). Adhesins further mediate the colonization of bacteria in their favorable niches by helping develop biofilms, which cause over 80% of chronic infections in humans. Once formed, biofilms are resistant to various bactericidal treatments, including the use of antibiotics. With a current shortage of methods to treat biofilm-related diseases and the

emerging prevalence of antibiotic-resistant bacteria, there is an urgent need to develop new strategies to treat bacterial infections. Since adhesins play a critical role in the initial stages of biofilm formation, the development of adhesin lectin antagonists holds great promise for treating various infections by blocking bacterial adhesion to human cells. To date, this anti-adhesion strategy has led to the development of some promising treatments against diseases. For example, binding of uropathogenic *Escherichia coli* (UPEC) to mannose-containing glycoproteins of human uroepithelium via the adhesin lectin FimH is an enabling step towards most urinary tract infections(13, 14). Mannoside-based FimH antagonists developed through structure-guided design can effectively block UPECs from binding to the human uroepithelium(15, 16). These compounds have demonstrated fast-acting efficacy against chronic urinary tract infections, and can prevent the disease when used as prophylactics(17-19). Despite these successes, widespread application of this anti-adhesion approach to treat other bacterial infections is hampered by a lack of knowledge at the molecular level of ligand recognition by other adhesin lectin modules.

*Marinomonas primoryensis* ice-binding protein (*MpIBP*) is a large (~ 1.5 MDa) Repeats-In-Toxin (RTX) adhesin found on the surface of its Antarctic Gram-negative bacterium(11, 20-22). While the N terminus of *MpIBP* anchors the giant protein to the bacterial outer membrane, the ligand-binding modules near the C terminus bind the bacterium to both ice and photosynthetic diatoms to form symbiotic biofilms on the underside of sea ice. *MpIBP* was initially extracted from the cell lysate of its native bacterium by an ice-affinity purification step(20). Intriguingly, the protein failed to elute from a Superdex S200 size-exclusion column intended for further purification. This suggested that the adhesin interacts with the Superdex matrix, which is based on porous agarose particles covalently linked to dextran, a complex branched polymer of  $\alpha$ -D-1,6-glucose. Bioinformatic analyses indicated the presence of a ~ 20-kDa domain near the C terminus of *MpIBP* that is a member of the PA14 family, which is a carbohydrate-binding lectin module widely distributed across several kingdoms of life(23, 24). PA14 homologues are found in human proteins like fibrocystin(25), and fungal and bacterial proteins such as  $\beta$ -glucosidases(26, 27),

proteases(23), and adhesins(10, 21, 28, 29). PA14 domains share a common  $\beta$ -sandwich fold and the presence of two consecutive aspartate residues in a *cis* peptide linkage (*DcisD*). The *DcisD* motif coordinates a  $\text{Ca}^{2+}$  ion that is directly involved in binding polar vicinal hydroxyl groups of various carbohydrates(10, 12, 29). Despite these conserved features in their ligand-binding sites, PA14 lectins in microbial adhesins have a broad specificity profile for a range of carbohydrates. In this regard, how PA14 lectins of bacterial adhesins recognize their ligands remains unclear. Yet, this highly conserved module is widespread in adhesins of many different bacteria, including those of human pathogens. These important attributes justify the pursuit of structural studies to elucidate the molecular basis of ligand recognition by *MpPA14*, which may set the stage for the subsequent development of antagonists to block harmful adhesion.

In this report, we use various types of binding assays and glycan microarrays to show that *MpPA14* is a lectin with an unusual binding promiscuity to monosaccharides but is specific in binding certain polysaccharides. X-ray crystal structures of *MpPA14* in complex with 15 different simple sugars at atomic resolution reveal the molecular basis for the uncommon ligand selectivity by the lectin. We further show that the adhesion of *MpPA14* to its host diatom cells can be fully abolished by a micromolar concentration of L-fucose. Since bioinformatic analyses indicate that lectins highly similar to *MpPA14* are present in many bacterial adhesins, including those from human pathogens such as *Vibrio cholerae* and *Vibrio vulnificus* (12), there is an opportunity to use a structure-based approach to devise high-affinity lectin antagonists to block harmful biofilm formation or to develop molecular probes to detect these microbes.

## Results and Discussion

### ***MpPA14 interacts strongly with fucose and N-acetyl glucosamine***

To gain insight into the binding specificity of *MpPA14*, we investigated the relative affinity of various monosaccharides for the lectin by a comparative competition assay(12). *MpPA14* bound to Superdex resin was competitively released into solution by the progressive addition of free

sugars. The released protein concentrations measured by absorbance at 280 nm were plotted as a function of free sugar concentration to produce semi-quantitative binding curves (Figure 1A, B). The apparent dissociation constant ( $K_{dapp}$ ) calculated from these binding curves was used as a relative measure of affinity for each assayed sugar (Table 1). *MpPA14* lectin bound L-fucose the strongest with a  $K_{dapp}$  of 0.65 mM, followed by GlcNAc ( $K_{dapp}$  1.07 mM; Figure 1A). Glucose and 2-deoxy-glucose bound the lectin with similar affinity, giving  $K_{dapp}$  values of 1.36 and 1.37 mM, respectively. D-mannose, and methyl- $\alpha$ -D-glucose bound *MpPA14* with slightly weaker affinity ( $K_{dapp}$  = 1.7 mM and 2.1 mM, respectively), and the binding of D-allose, 3-O-methyl-D-glucose and D-galactose was significantly diminished to  $K_{dapp}$  values between 4.1 and 6.8 mM. There was no measurable interaction between *MpPA14* and N-acetyl-galactosamine (GalNAc). D-ribose bound dextran more strongly than its derivative 2-deoxy-D-ribose ( $K_{dapp}$  of 6.8 mM as opposed to 18 mM; Figure 1B, Table 1). L-arabinose exhibited higher affinity for *MpPA14* than the other pentoses, with a  $K_{dapp}$  of 2.2 mM.

To further assess the binding thermodynamic parameters of *MpPA14* ligands, we performed isothermal titration calorimetry (ITC) with L-fucose, N-acetyl-glucosamine (GlcNAc) and glucose (Figure 1C-E). The ITC measurements produced rectangular hyperbolic curves for all three simple saccharides, and fitted well to a one binding-site model with calculated N values being close to 1<sup>(12, 21)</sup>. ITC ranked the affinity of these three ligands in the same order shown by the competition binding assay, with L-fucose as the strongest ligand followed by GlcNAc and then glucose. The  $K_d$  values calculated from the ITC measurements were significantly lower than the  $K_{dapp}$  values obtained from the competition assay (Figure 1F, Table 1). However, this is to be expected because the dextran beads used in the competition assay have multiple binding sites nearby that attract the lectin, whereas the calorimetry was done with free sugars in solution. With  $K_d$  values of 147  $\mu$ M and 170  $\mu$ M for L-fucose and GlcNAc, these two ligands had a greater than 2-fold higher affinity for *MpPA14* than did glucose ( $K_d$  = 350  $\mu$ M). In general, the affinity of lectins for monosaccharides ( $K_d$  values) lies within the high micromolar to millimolar range(8, 30, 31). Thus, our results showed the *MpPA14* domain from its bacterial adhesin had relatively high

affinity for the three strongest ligands in comparison to other lectins. Furthermore, negative enthalpic ( $\Delta H$ ) and entropic ( $\Delta S$ ) contributions were calculated for all three carbohydrates when they bound to *MpPA14*, which indicated the binding was driven primarily by polar interaction such as the formation of hydrogen and ionic bonds rather than hydrophobic interactions. This was consistent with the observation that the  $\text{Ca}^{2+}$ -dependent ligand-binding site of *MpPA14* consisted of mainly polar and charged amino acids without any residues with large hydrophobic side chains. We therefore acquired detailed structural information to study *MpPA14* ligand recognition.

### ***Structural basis of MpPA14 selectivity for glucofuranoses***

To examine the molecular basis of carbohydrate recognition by *MpPA14*, we determined the X-ray crystal structures of the lectin in complex with 14 new saccharides to a resolution of 1-1.3 Å (Table S1-3). The lectin fold is a  $\beta$ -sandwich domain that binds four to seven  $\text{Ca}^{2+}$  ions (Ca1-7) on its surface(21) (Figure S1A). Ca1 is coordinated by the *DcisD* motif (Asp110 and Asp111) on the periphery of the protein, which is directly involved in binding carbohydrate with help from amino-acid residues in loops 9 and 11 (L9 and L11; Figure S1B). While Ca 2-4 likely have a role in lectin folding(12, 21) (Figure S1C-E), Ca5-7 have few ligands from the lectin and are probably an artifact from the crystallization condition that contained over 100 mM of  $\text{CaCl}_2$ . There were no substantial conformational changes to the overall lectin fold when it was complexed with different sugars (r. s. m. d. <0.1 Å).

As suggested by ITC, sugar recognition by *MpPA14* is primarily driven by polar interactions in a  $\text{Ca}^{2+}$ -dependent manner. Glucose, GlcNAc, and other glucofuranose-containing carbohydrates including 2-deoxy-glucose, methyl- $\alpha$ -glucose and two disaccharides, sucrose and trehalose, all bound to the *Mp*-PA14-Ca1 via their 3, 4 *trans* vicinal diols in gauche configuration with a dihedral angle of  $\sim 60^\circ$  (Figure 2A, Figure S2, S3A, B). This interaction is further enhanced with the diol being coordinated by the side-chain carboxyl and hydroxyl oxygens of the *DcisD* motif, and main-chain and side-chain protein ligands from L11 (Gln156, Gly157 and Asp159, Figure 2B). The acetyl group on the C-2 position of GlcNAc interacts with the side-chain atoms of Asp 159 on L11 (Figure 2C), holding the aspartate side chain down in one stable conformation. This additional

interaction likely accounts for the higher affinity of GlcNAc to the lectin than for other glucopyranoses.

Structural data shown here for *MpPA14* contrast with the previously reported structure of *MhPA14* in complex with glucose(12). *MhPA14* is a *MpPA14* homolog from an RTX adhesin of the oil-degrading bacterium, *Marinobacter hydrocarbonoclasticus*. With a similar ligand-binding site to *MpPA14*(12), *MhPA14* also had a strong preference for binding L-fucose and glucopyranoses over other monosaccharides. However, X-ray crystallography showed *MhPA14* complexing glucopyranose via its 1,2 diol. Given that the C-2 position of GlcNAc lacks the hydroxyl group required for interacting with *MpPA14* via the 1,2 diol, the binding mode shown by the *MhPA14*-glucose complex could not explain the lectin's high affinity for this acetylated sugar. Close inspection of the *MhPA14*-glucose complex structure revealed that the monosaccharide in the carbohydrate-binding site is in direct contact with a neighboring symmetry-related molecule, indicating the tight packing of the unit cell might have caused the sugar to bind in a less favorable configuration. Moreover, the *apo-MhPA14* structure showed that its unoccupied ligand-binding site is involved in crystal contact with the symmetry-related molecules, leaving insufficient space for carbohydrate binding. The observed crystal-packing artifacts explained why co-crystallization of *MhPA14* with various other sugars, and direct soaking experiments with the *apo-MhPA14* crystal were futile.

### ***Why L-fucose is a better ligand than glucopyranoses***

Based on results from docking experiments, it was proposed that L-fucose binds *MhPA14* via its 2,3 diol(12). However, the well-resolved 1-Å electron density map in this study unambiguously showed fucose bound *MpPA14* with its *cis* 3, 4 diol in the gauche conformation with a dihedral angle of 47° (Figure 2D). In contrast to the *MpPA14* hexose ligands, which are all in the D-configuration, fucose is in the L-configuration, with hydroxyl groups of the fucopyranose ring pointed in opposite directions. This helps the endocyclic oxygen atom of fucose to point toward L11 and hydrogen bond with the sidechain of Gln156 (Figure 2E). Additionally, the hydroxyl on the  $\alpha$ -anomeric carbon may hydrogen bond with the sidechain of Ser130 on L9, clamping the

pyranose ring tightly into the binding site (Figure 2E, F). The L-fucose-*MpPA14* interaction is distinct from that shown by the bacterial C-type lectin, LecB, from *Pseudomonas aeruginosa*, which uses two side-by-side  $\text{Ca}^{2+}$  ions to directly coordinate the 2, 3, 4 triol of L-fucose(32, 33). The additional ionic interaction between LecB and L-fucose can explain its enhanced affinity ( $K_d = 58 \mu\text{M}$ ) for the sugar compared to that of *MpPA14* ( $K_d = 147 \mu\text{M}$ ).

### ***Promiscuity of MpPA14 in monosaccharide recognition***

To investigate the molecular basis for the plastic nature of *MpPA14* in binding various monosaccharides, we investigated *MpPA14* structures in complex with various glucose epimers and derivatives.

Mannose bound *MpPA14* slightly weaker than glucose (Figure 1A, Table 1). The electron density map for the mannose-*MpPA14* complex indicated the sugar bound in two distinct conformations (Figure 3A, B, Figure S3B). Like glucose, D-mannose bound *MpPA14* via the 3, 4 diol. However, since the mannose C-2 hydroxyl moiety is in an axial position, its oxygen atom may clash with the  $\beta$ -carbon of the Ser130 as they are only 3 Å away from each other (Figure 3C). In addition, as the C-2 and C-3 hydroxyl groups of mannose are positioned in *cis*, they may form an intramolecular hydrogen bond that further weakens the 3, 4-diol from binding Ca1. Alternatively,  $\beta$ -mannopyranose can bind *MpPA14* using a second configuration where its 2,3 diol anchors the saccharide ring in an inverted fashion, allowing the ring oxygen to hydrogen bond with the side-chain amide group of the Gln156 (Figure 3D). However,  $\alpha$ -mannopyranose failed to fit into the electron density via this binding mode, which indicates that *MpPA14* can only recognize the less prevalent  $\beta$ -anomer in the equilibrium via its 2,3 diol (33%  $\beta$ -mannopyranose as opposed to 62%  $\alpha$ -mannopyranose at 30 °C)(34). This apparent lack of one distinct stable binding configuration explains the relatively inferior affinity of mannose compared to glucose.

With the C-3 hydroxyl in the axial position, allopopyranose cannot bind *MpPA14* via its *cis* vicinal 3, 4 diol as this would cause the saccharide ring to clash with residues of L11 (e.g. Gln156). Unexpectedly, the binding site of the lectin contained the furanose form of allose with its 2,3 diol interacting with Ca1 (Figure 3E, Figure S3C). The furanose rings lean towards L11, with their



endocyclic oxygen interacting with the side-chain amide group of Gln156, and the C-5 hydroxyl group extends out to hydrogen bond with the side-chain hydroxyl of Ser130 (Figure 3F). At 30°C, approximately 92% of allose exists as pyranoses in solution (Figure 3G). Yet *MpPA14* binding appears to be dependent on the rare presence of the allofuranose, which only makes up ~8% of allose in solution, explaining the feeble affinity of this sugar for the lectin (Table 1). Similarly, 3-O-methyl-glucose cannot bind *MpPA14* via the 3, 4 diol because of the substituted methyl group on its C-3. This sugar compensates by binding using the 1,2 diol of the  $\beta$ -anomer (Figure S4A), resulting in its considerably weaker binding to the lectin compared to glucopyranoses and mannose.

Galactose has its C-4 hydroxyl in the axial position instead of being equatorial as in glucose. Docking of the galactopyranose ring to *MpPA14* via the 3, 4 diol is not possible due to steric hinderance against Gln129 and Ser130 on L-9. Instead, galactose can only interact with *MpPA14* via the 1,2 diol of its rare  $\beta$ -anomer (Figure 3H). These limitations explain the relatively weak interaction between galactose and *MpPA14* (Table 1). Results from the binding analysis of GalNAc verify this assessment. Having just shown the 3, 4 diol of galactopyranose cannot complex *MpPA14*, binding of GalNAc is completely abolished because its 1,2 diol is unavailable due to the C-2 hydroxyl being substituted with an acetyl group.

We further analyzed the crystal structures of *MpPA14* in complex with three pentoses: L-arabinose, ribose and 2-deoxy-ribose, as well as inositol, which has an unusual 6-carbon saccharide ring without an endocyclic oxygen (Figure S3B, C, S4). These four carbohydrates bound *MpPA14* weaker than glucose and mannose (Table 1). Crystal structures showed that *MpPA14* selects the pyranose form of pentoses for binding. As pentoses have a higher percentage of furanose present in the conformational equilibria than do hexoses, selectivity for the more thermodynamically stable pyranoses might contribute to the weaker affinity of pentoses towards the lectin. For instance, despite L-arabinose existing in solution predominantly in the pyranose form at 25 °C (57 %  $\alpha$ - vs 30.5%  $\beta$ -arabinopyranose) (35), only the  $\alpha$ -anomer complexes *MpPA14* via its 1,2 diol (Figure 3I). The same rationale can be used to explain the

even weaker affinity of ribose and its derivative 2-deoxy ribose for *MpPA14* (Figure S4B, C) (36). In the case of inositol, the composite electron density map indicates it binds *MpPA14* in several different conformations (Figure S4D-F). This promiscuous binding mode is indicative of a lack of one stable binding conformation, which might explain inositol's moderate affinity to *MpPA14*.

In summary, X-ray crystallography has elucidated the molecular basis of *MpPA14*'s promiscuity in binding a range of monosaccharides. Remarkably, the lectin can discern favorable conformations of these monosaccharides from their non-binding anomers, even when the latter are much more prevalent in the equilibria (e.g. allofuranose as opposed allopyranose). Nevertheless, monovalent or simple carbohydrate oligomers are typically not the physiological targets of lectins(30). In the context of *MpPA14*, it likely binds complex glycans or glyco-proteins present on the surfaces of microbes where the proximity effect of having numerous identical or similar end groups increases the avidity of the lectin interaction. In this way the sugar-binding activity of *MpPA14* can help to form biofilms. This prompted us to survey the lectin-sugar interactions from a broad spectrum of complex carbohydrates using glycan microarray technology.

### ***MpPA14 binds glucopyranose and fucose moieties of complex glycans***

To dissect *MpPA14*'s role in the formation of mixed-species biofilms, we probed two different microbial glycan microarrays for lectin binding partners(37). We first analyzed the binding of GFP-*MpPA14* to 16 different polysaccharides consisting primarily of glucans and mannans from bacteria and fungi (Imperial College Glycosciences Laboratory). Four glucans: pullulan, lentinan, dextran and grifolan bound most avidly to *MpPA14* (Figure 4A). To emphasize the specificity of this interaction, six of the other polysaccharides showed negligible or no detectable binding, which included glucans such as curdlan and those purified from oat and barley, as well as mannoprotein, glucurono-xylomannan, and GN6-AO which is hexasaccharide of 1,4 linked GlcNAc (Chitin) with an aminoxy group (AO; Table S4). Consistent with findings from our structural and binding analyses (Figure 1-3), the four strongest binders contain multiple glucopyranoses with unoccupied 3, 4 diols either as internal or terminal moieties in their linear

backbone (pullulan) as well as in their branches (lentinan, dextran and grifolan; Figure 4A). In contrast, weak or negligible binding to *MpPA14* was demonstrated for linear glucans formed through 1,3 and 1,4 linkages such as  $\beta$ -glucans of oat and barley. Each of these linear polysaccharides has only one 3, 4 diol set from their terminal glucopyranose accessible for *MpPA14* binding, while all potential 3, 4 diols in the backbone are involved in the formation glycosidic bonds (Figure 4A). Similarly, GN6-AO interacted poorly with *MpPA14* because it too has only one free 3, 4 diol in the terminal GlcNAc. Furthermore, moderate lectin-glycan interactions were observed for the highly branched N-mannoprotein from the fungus *Candida albicans* (Figure 4A, orange bar, Table S4), while binding to glucurono-xylomannan and mannoprotein from the fungus *Aspergillus fumigatus* was negligible as these glycans lack the more favorable structural epitopes of 3, 4 diols on either glucopyranose or L-fucose.

To expand the repertoire of glycans beyond glucans and mannans, we performed a second focused microarray composed of 32 polysaccharides found in microbes such as fungi and bacteria, as well as macroalgae and plants (Figure 4B). Similar to the first microarray, *MpPA14* showed significant binding to some glucans that present multiple sets of unoccupied 3, 4 diols, which included pustulan, pachyman and scleroglucan (Figure 4B, dark blue bars; glycans 20, 16 and 17, respectively; Table S5). In addition, *MpPA14* interacted avidly with fucoidans from macroalgae. The strongest *MpPA14*-binding fucoidans were to Cladosiphon(38), Sargassum and *Ascophyllum nodosum* (glycans 27, 24 and 28, red bars). Since fucoidans are algal polysaccharides primarily consisting of a linear backbone of sulphated  $\alpha$ -1,3- or  $\alpha$ -1,3;1,4-linked-L-fucose(39), *MpPA14* can interact by binding the terminal moieties on the backbone and branches with unoccupied 3, 4 diols. In contrast, *MpPA14* did not bind to polysaccharides such as arabinan, galactan, galactomannan, xylan, xyloglucan and porphyran (glycans 2, 3, 6, 11, 21 and 32 respectively; Figure 4B) as these lack the structural epitopes required for favorable interactions with *MpPA14*. For instance, while arabinan is a polymer of arabinose, a sugar that *MpPA14* binds, X-ray crystallography showed that *MpPA14* is selective in only forming a complex with  $\alpha$ -L-arabinopyranose (Figure 3I). This conformer is not present in the arabinan polymer

composed of 1,5 linked  $\alpha$ -L-arabino-furanoses, which are then not free to transition to the pyranose form. Similarly, since the *MpPA14* binds galactose via the 1,2 diol ( $\beta$ -anomer) (Figure 3H), the lectin cannot interact with galactans as they are polymers of  $\beta$ -1,4-D-galactose (Figure 4B, Table S5).

Some differences were observed in the binding results with several polysaccharides present in both the first and second glycan microarrays. Examples include: mannan from *S. cerevisiae*, which showed weak binding to *MpPA14* in the first array (glycan number 12; Figure 4A), but had no detectable interaction with the lectin in the second array (glycan number 8; Figure 4B); Pullulan bound *MpPA14* more strongly than pustulan in the 1<sup>st</sup> array (glycan numbers 2 and 11, respectively; Figure 4A), whereas their relative affinities were reversed in the 2<sup>nd</sup> array (glycan numbers 12 and 20, respectively; Figure 4B). These minor discrepancies in the binding results could be due to differences in the polysaccharide sources or the different methods used to immobilize them onto the microarrays(40, 41). Nevertheless, both arrays pointed to the key result that *MpPA14* selectively binds glucans with multiple unoccupied 3, 4 diols, while the lectin does not recognize glycans such as arabinans, galactans and xylans. Furthermore, the finding that *MpPA14* interacted strongly with fucoidans is consistent with the *MpPA14*-fucose interaction demonstrated by the binding and structural data. This result may have physiological relevance, as L-fucose-containing polysaccharides are highly prevalent in the exudates of diatoms(42), at least one of which is a natural host of *M. primoryensis*.

Since the PA14 domain is widespread in bacteria, including some that are human commensals and others that are pathogens, we reasoned that *MpPA14* and its homologs might interact with mammalian glycans. Therefore, we tested the lectin on a microarray consisting of 609 complex mammalian glycans (Consortium for Functional Glycomics, version 5.2). Four glycans (506, 431, 433 and 474) stood out amongst the strongest binders (Figure 4C). They share a common architecture as moderately branched mannose-containing oligomers with a bisecting GlcNAc motif. Each of the four glycans has three to five terminal GlcNAc moieties with 3, 4 diols available for complexing *MpPA14*. Glycans 506 and 474 also have one  $\alpha$ -L-fucose moiety linked to the

surface-immobilized GlcNAc. Interestingly, the strongest binder, glycan 506 differs from glycan 433 only by the addition of the  $\alpha$ -L-fucose, suggesting this monosaccharide might contribute to the higher affinity of glycan 506 by presenting an extra binding site for the lectin. Glycans with fewer binding epitopes of GlcNAc and fucose bound weaker in general. Out of the 61 glycans that did not bind *MpPA14* (RFUs of 20 or below), 33 have N-acetyl-neuraminic acid as their terminal sugar, while another 25 of these non-binders end with either galactose or GalNAc (Figure 4C). Indeed, as shown by our structural analyses above, these sugars lack the 3, 4 diol motifs of glucopyranoses and L-fucose preferred for *MpPA14* recognition.

### ***MpPA14 lectin homologs are found in pathogens***

The binding conformations of various monosaccharides identified in the structural analyses can lay the foundation for the structure-guided design of glycan-based probes for detecting microbes or for making inhibitors to disrupt bacterial adhesion. *MpPA14* homologs are widespread in the adhesins of Gram-negative bacteria such as the previously reported *MhPA14* from the oil-degrading *M. hydrocarbonoclasticus*, as well as those adhesins that help pathogenic bacteria infect specific niches. For example, a large RTX adhesin from the flesh-eating human pathogen, *Vibrio vulnificus*, contains a *MpPA14* homolog (*VvPA14*) with 41.5% identity at the protein level. Moreover, the amino-acid residues involved in coordinating Ca<sup>1</sup> and recognizing glycans are conserved between the *MpPA14* and *VvPA14* (Figure S1F). Despite small deviations in amino-acid sequence between *MpPA14* and *MhPA14* from *M. hydrocarbonoclasticus*, these lectins have the same monosaccharide ligands and there is insignificant variation in their complex glycan recognition (12). With its ligand-binding site even more like *MpPA14* than that of *MhPA14*, *VvPA14* probably binds to the same simple sugars. It is therefore of interest to test the inhibitory effect of strong PA14 binders identified in this study to set the stage for developing novel strategies for modulating bacterial adhesion.

### ***L-fucose blocks MpPA14-diatom interaction***

Having identified L-fucose as the strongest monosaccharide ligand for *MpPA14*, we set out to validate its potential as an inhibitor for the lectin-dependent bacteria-diatom interaction that led to the discovery and characterization of this protein(21). Here we tested if L-fucose can block fluorescently labelled *MpPA14* from binding to the diatom *C. neogracile*.

*C. neogracile* is a psychrophilic marine diatom found in Antarctic waters(43). As shown in Figure 5A-D, *C. neogracile* are roughly 10  $\mu\text{m}$  in length with a width of 3-4  $\mu\text{m}$ . Each diatom cell has 1-4 projections protruding from the corners. Given its photosynthetic capability, *C. neogracile* contains chlorophyll that is intrinsically fluorescent. However, the binding of FITC-labelled *MpPA14* to *C. neogracile* resulted in a 40-fold increase of fluorescence over the basal auto-fluorescence of the diatom (Figure 5A, B, Figure S5). The addition of 0.5 mM L-fucose was extremely effective at blocking accumulation of lectin on the diatom (Figure 5C), as the free sugar outcompeted the cell surface glycans for the binding *MpPA14* and displaced 95% of the fluorescent signal (Figure 5E). This competitive effect fell off to ~40% as the L-fucose concentration was reduced to 0.1 mM (Figure 5E). The effective concentration of L-fucose needed to block association is significantly higher than the  $K_d$  of 147  $\mu\text{M}$  for *MpPA14*-fucose interaction determined by ITC. We reason that glycans coating the diatom cell membrane present numerous end group binding sites in close proximity that can serve as a “molecular velcro” for *MpPA14* binding(30).

In contrast to the inhibitory effect of L-fucose, the non-binder of *MpPA14*, GalNAc, was unable to prevent the lectin from binding the diatom even at 50 mM (Figure 5D, E, Figure S5), validating the results from the binding and structural studies. Importantly, adding 0.5 mM L-fucose to diatoms pre-coated with FITC-labelled *MpPA14* resulted in the dissociation of the lectin from the cells. These results suggest that L-fucose can disrupt pre-existing associations between bacteria and diatoms.

## Materials and Methods

### *Dextran-based comparative competition assay*

The dextran resin competition assay was performed as previously described for *MhPA14*(12). Briefly, *MpPA14* with GFP fused to its N terminus (GFP-*MpPA14*) was suspended with an aliquot of Superdex-200 (S200) resin. Following an incubation period with gentle mixing, the S200 resin bound with GFP-*MpPA14* was pelleted by centrifugation. The pellet was washed twice with 50 mM Tris-HCl (pH 9), 150 mM NaCl and 5 mM CaCl<sub>2</sub>, and the A<sub>280nm</sub> of the supernatant from the second wash was used as the baseline reading. Next, after resuspension in the same buffer, aliquots of 1.67 μmoles of saccharide were sequentially added to the solution six or seven times with the A<sub>280nm</sub> of the supernatant being measured after each addition to quantify the release of lectin. The final addition of saccharide was 5 μM. Data from the dextran-affinity assay were plotted using GraphPad Prism after subtracting the background. Next, the data were fitted to a non-linear regression of one-site-specific binding, which follows the model  $Y/B_{max} = X/(K_d + X)$ , with B<sub>max</sub> as the maximum specific binding and K<sub>d</sub> as the equilibrium binding constant.

#### ***Isothermal Titration Calorimetry (ITC)***

Isothermal calorimetric titration (ITC) measurements were performed at 30 °C with a MicroCal VP-ITC instrument (Malvern). *MpPA14* (400 μM) was mixed with serial 5-μl aliquots of 8-mM sugar solution (L-fucose, GlcNAc, or glucose). Sugars were automatically added by a rotating syringe (400 RPM) at 5-min intervals into the *MpPA14* solution for a total of 50 injections. The data were analyzed by Origin software Version 5.0 (MicroCal).

#### ***Co-crystallization, X-ray diffraction and structure solutions of MpPA14 with various sugars***

Details for the cloning, expression, purification, and crystallization of *MpPA14* were previously reported(12, 21). Co-crystallization of *MpPA14* with various sugars was performed using the “microbatch-under-oil” method by mixing equal volumes of ~ 20 mg/mL protein with a precipitant solution composed of 0.2 M calcium chloride, 0.1 M HEPES (pH 7), 20% (v/v) polyethylene glycol 3350 and 0.5-1M of different sugars. In addition to the previously reported *MpPA14*-glucose structure, the 14 different new sugars that were complexed with *MpPA14* were: L-fucose, GlcNAc, galactose, allose, mannose, 3-O-methyl-glucose, 2-deoxy-glucose, α-methyl-glucose, myo-inositol, sucrose, trehalose, L-arabinose, ribose, and 2-deoxy-ribose.

X-ray crystallographic data were collected at either the 08ID-1 beamline of the Canadian Light Source synchrotron facility or at the 23-ID-B beamline of the Advanced Photon Source via remote access. Data were indexed and integrated with X-ray Detector Software (XDS)(44) and CCP4-Aimless(45) or the DIALS/xia2 in the CCP4i2 software suite(46). The structure solutions for all complexes were obtained by molecular replacement using the *MpPA14* glucose-bound structure as the search model(21). The structures were refined using CCP4-Refmac5(47) or Phenix(48).

### **Glycan arrays**

Three different glycan arrays were probed with *MpPA14*. Two of the arrays focused on fungal, bacterial, algal and plant polysaccharides, and the other on mammalian glycans. The first glycan array was done at the Carbohydrate Microarray Facility (Glycosciences Laboratory, Imperial College). GFP-*MpPA14* (50 µg/mL) was exposed to the 'Fungal, bacterial and plant polysaccharide array set 2', which contained duplicates of 20 saccharide probes from a variety of organisms. An Alexa Fluor 647-tagged anti-GFP antibody was used for detecting the lectin, and the duplicates were averaged to produce the final relative fluorescence unit (RFU) values. In a negative control experiment, where anti-GFP antibody was directly reacted to the saccharide probes, four glycans: lipomannan and lipoarabinomannan from *Mycobacterium tuberculosis*, lipoarabinomannan from *Mycobacterium smegmatis*, and native o-glycoprotein from *M. tuberculosis* showed significant binding to the anti-GFP antibody as they produced RFUs of greater than 1,000. This indicated that these four glycan samples yielded false positive results. Therefore, these four polysaccharides were discarded from the analyses shown in the Results section of our paper.

The second glycan array was performed at the Max Planck Institute for Marine Microbiology (Bremen, Germany). The array contained duplicates of 32 polysaccharides including those from macroalgae, bacteria, fungi, and land plants (see details in Table S5). N-terminally His-tagged *MpPA14* was incubated with the array and binding of the lectin to the polysaccharides was detected by an anti-His tag secondary antibody conjugated to alkaline phosphatase (Sigma-Aldrich). Microarray probing and quantification were performed as previously described(41).



Maximal mean (average of the duplicates) signal intensity was set to 100 and the rest of values were normalized accordingly. A cut-off of 5 was applied (49).

The third glycan array screening was done by the Consortium for Functional Glycomics (Harvard Medical School) using Version 5.2 of a printed mammalian glycan array, which contained 609 glycans(50). TRIT-C labelled *MpPA14* was incubated with the surface-immobilized glycans and the array was scanned at an excitation wavelength of 532 nm. The resulting RFUs were used as a measure of the bound protein. Each glycan was present in six replicates on the array, and the highest and lowest value from each set was omitted to avoid outlying values. The RFU values from the remaining four replicates were averaged.

### ***Diatom binding experiments***

The Antarctic diatom, *Chaetoceros neogracile*, was cultured as previously described(21, 43). FITC-labelled *MpPA14* (FITC-*MpPA14*, 0.2 mg/mL) in the presence or absence of sugars was incubated with diatoms in buffer (50 mM Tris-HCl pH 9, 300 mM NaCl, 5 mM CaCl<sub>2</sub>) with gentle mixing for 2 h. Next, diatoms were pelleted by centrifugation for 3 min at 7,000 rpm, and the resulting supernatant was discarded. This procedure was repeated three times to wash away unbound FITC-*MpPA14* before the diatom pellet was finally resuspended in 20 µL buffer, which was then used to make slides for fluorescence microscopy. In a separate experiment to test if fucose could compete off the *MpPA14* that was already bound to diatoms, FITC-*MpPA14* was incubated with diatom for 1.5 h before fucose was added. The rest of the experiment followed the same procedure as described above.

Images were obtained using an Olympus IX83 inverted fluorescence microscope equipped with an Andor Zyla 4.2 Plus camera. Quantification of the fluorescence intensity was done using Fiji ImageJ. The corrected total cell fluorescence (CTCF) was calculated using the formula: CTCF = Integrated Density – (Area of selected cell x Mean Fluorescence of the background)(51). Quantification of 30 individual diatom cells was done for each treatment. Graphs were made using GraphPad Prism.

## Conclusions and Outlook

In this study, we elucidated the molecular basis for ligand recognition by a lectin module widespread in bacterial adhesins. The atomic details revealed by X-ray crystallography not only helped clarify the plasticity of *MpPA14* in binding various monosaccharide ligands, but also revealed how the lectin recognizes complex polysaccharides in a more specific manner. We further show that a low millimolar amount of L-fucose can be used to disrupt binding of the lectin to diatom cells. The atomic details for the lectin-carbohydrate interactions elucidated here may serve as the starting points for the development of adhesin antagonists via ligand-based design. For instance, the fact that GlcNAc gains a 2-fold higher affinity for *MpPA14* than glucose simply from the replacement of the C-2 hydroxyl with an acetyl group suggests that appending designed substituents on various positions of avid binders such as the C-2 and C-5 of L-fucose might further enhance their potency (Figure 2C, F).

Given the high similarity between *MpPA14* and lectin folds in the adhesins of pathogenic bacteria, this work gives insight into how harmful bacterium-host interactions might be controlled through modulation of the lectin-glycan interactions. This anti-adhesion approach holds promise as an alternative or additive approach to treat infections without the excessive use of antibiotics and may thus help mitigate problems with multidrug-resistant bacteria(17, 52, 53).

## Acknowledgments

**General:** We are grateful to Dr. John Allingham for the use of his home source X-ray diffractometer at Queen's University, and to staff members at the Canadian Light Source in Saskatoon and the Advanced Photon Source in Chicago for access to data collection at these synchrotrons. We would like to thank Dr. EonSeon Jin, Hanyang University, Seoul, for the gift of the diatom, *Chaetoceros neogracile* and Dr. Saeed Rismani Yazdi for assistance with the diatom cultures. We thank Dr. Xu Deng from Central South University (China) for fruitful discussions, and for his thoughtful comments as well as those from Drs. Chantelle Capicciotti and Inka Brockhausen on the initial draft of the manuscript. We thank Mr. Kim Munro for acquiring and

interpreting ITC data. We appreciate Ms. Sherry Gauthier's assistance with molecular cloning. In addition, we acknowledge the glycan array facilities at the Consortium for Functional Glycomics (CFG), Harvard Medical School and the Glycosciences Laboratory at Imperial College for their help.

**Funding:** This project was funded by a Natural Science and Engineering Research Council (NSERC, [http://www.nserc-crsng.gc.ca/index\\_eng.asp](http://www.nserc-crsng.gc.ca/index_eng.asp)) Discovery Grant (RGPIN-2016-04810).

PLD holds the Canadian Research Chair in Protein Engineering, and TDRV held a Canadian Graduate Scholarship from NSERC.

### **Author Contributions**

S.G. and P.L.D. conceived the study, designed the experiments, and wrote the manuscript. S.G. performed co-crystallization, data collection, and structure determination of the X-ray crystal structures. R.E. and T.D.R.V. performed the comparative binding assays. H.Z. and C.S. performed the diatom binding experiments and analyzed data. S.V. and J.H. performed one of the microbial glycan microarrays and analyzed data. All authors contributed to the revision of drafts of the manuscript.

**Competing interests:** The authors declare that they have no competing interests.

### **Data and materials availability:**

X-ray crystal structure coordinates solved in this study have been deposited in the Protein Data Bank with accession codes of 6X7J (*MpPA14*-fucose), 6X7X (*MpPA14*-mannose), 6XAQ (*MpPA14*- $\alpha$ -methyl-glucose), 6X7Z (*MpPA14*-inositol), 6X7Y (*MpPA14*-GlcNAc), 6X7T (*MpPA14*-allose), 6X9M (*MpPA14*-3-O-methyl-glucose), 6X95 (*MpPA14*-2-deoxy-glucose), 6XAC (*MpPA14*-galactose), 6X8D (*MpPA14*-arabinose), 6X8Y (*MpPA14*-ribose), 6X9P (*MpPA14*-2-deoxy-ribose), 6X8A (*MpPA14*-sucrose) and 6XA5 (*MpPA14*-trehalose). The data that support the findings of this study are available from the corresponding author P.L.D upon reasonable request.

## References

1. A. Varki, Evolutionary Forces Shaping the Golgi Glycosylation Machinery: Why Cell Surface Glycans Are Universal to Living Cells. *Csh Perspect Biol* **3** (2011).
2. A. Varki, Biological roles of glycans. *Glycobiology* **27**, 3-49 (2017).
3. G. F. Clark, The role of carbohydrate recognition during human sperm-egg binding. *Hum Reprod* **28**, 566-577 (2013).
4. B. Lepenies, R. Lang, Editorial: Lectins and Their Ligands in Shaping Immune Responses. *Front Immunol* **10** (2019).
5. E. Hebert, Endogenous lectins as cell surface transducers. *Bioscience Rep* **20**, 213-237 (2000).
6. F. S. Ielasi *et al.*, Lectin-Glycan Interaction Network-Based Identification of Host Receptors of Microbial Pathogenic Adhesins. *Mbio* **7** (2016).
7. D. A. Wesener *et al.*, Recognition of microbial glycans by human intelectin-1. *Nat Struct Mol Biol* **22**, 603-610 (2015).
8. A. B. Boraston, D. N. Bolam, H. J. Gilbert, G. J. Davies, Carbohydrate-binding modules: fine-tuning polysaccharide recognition. *Biochem J* **382**, 769-781 (2004).
9. Y. van Kooyk, G. A. Rabinovich, Protein-glycan interactions in the control of innate and adaptive immune responses. *Nat Immunol* **9**, 593-601 (2008).
10. M. Maestre-Reyna *et al.*, Structural basis for promiscuity and specificity during *Candida glabrata* invasion of host epithelia. *P Natl Acad Sci USA* **109**, 16864-16869 (2012).
11. S. Guo, T. D. R. Vance, C. A. Stevens, I. K. Voets, P. L. Davies, RTX Adhesins are Key Bacterial Surface Megaproteins in the Formation of Biofilms. *Trends Microbiol* **27**, 470 (2019).
12. T. D. R. Vance, S. Q. Guo, S. Assaie-Ardakany, B. Conroy, P. L. Davies, Structure and functional analysis of a bacterial adhesin sugar-binding domain (vol 14, e0220045, 2019). *Plos One* **14** (2019).
13. K. A. Krogfelt, H. Bergmans, P. Klemm, Direct evidence that the FimH protein is the mannose-specific adhesin of *Escherichia coli* type 1 fimbriae. *Infect Immun* **58**, 1995-1998 (1990).
14. A. Wellens *et al.*, Intervening with urinary tract infections using anti-adhesives based on the crystal structure of the FimH-oligomannose-3 complex. *PLoS One* **3**, e2040 (2008).
15. L. K. Mydock-McGrane, T. J. Hannan, J. W. Janetka, Rational design strategies for FimH antagonists: new drugs on the horizon for urinary tract infection and Crohn's disease. *Expert Opin Drug Discov* **12**, 711-731 (2017).
16. M. M. Sauer *et al.*, Binding of the Bacterial Adhesin FimH to Its Natural, Multivalent High-Mannose Type Glycan Targets. *J Am Chem Soc* **141**, 936-944 (2019).
17. C. K. Cusumano *et al.*, Treatment and prevention of urinary tract infection with orally active FimH inhibitors. *Sci Transl Med* **3**, 109ra115 (2011).
18. M. Totsika *et al.*, A FimH inhibitor prevents acute bladder infection and treats chronic cystitis caused by multidrug-resistant uropathogenic *Escherichia coli* ST131. *J Infect Dis* **208**, 921-928 (2013).
19. C. N. Spaulding *et al.*, Selective depletion of uropathogenic *E. coli* from the gut by a FimH antagonist. *Nature* **546**, 528-532 (2017).
20. S. Guo, C. P. Garnham, J. C. Whitney, L. A. Graham, P. L. Davies, Re-evaluation of a bacterial antifreeze protein as an adhesin with ice-binding activity. *PLoS One* **7**, e48805 (2012).
21. S. Guo *et al.*, Structure of a 1.5-MDa adhesin that binds its Antarctic bacterium to diatoms and ice. *Sci Adv* **3**, e1701440 (2017).
22. S. Guo *et al.*, Conserved structural features anchor biofilm-associated RTX-adhesins to the outer membrane of bacteria. *FEBS J* **285**, 1812-1826 (2018).
23. D. J. Rigden, L. V. Mello, M. Y. Galperin, The PA14 domain, a conserved all-beta domain in bacterial toxins, enzymes, adhesins and signaling molecules. *Trends Biochem Sci* **29**, 335-339 (2004).
24. M. E. Taylor, K. Drickamer, Convergent and divergent mechanisms of sugar recognition across kingdoms. *Curr Opin Struct Biol* **28**, 14-22 (2014).

25. C. Bergmann *et al.*, Spectrum of mutations in the gene for autosomal recessive polycystic kidney disease (ARPKD/PKHD1). *J Am Soc Nephrol* **14**, 76-89 (2003).
26. E. Yoshida *et al.*, Role of a PA14 domain in determining substrate specificity of a glycoside hydrolase family 3 beta-glucosidase from *Kluyveromyces marxianus*. *Biochem J* **431**, 39-49 (2010).
27. V. V. Zverlov, I. Y. Volkov, T. V. Velikodvorskaya, W. H. Schwarz, *Thermotoga neapolitana* bglB gene, upstream of lamA, encodes a highly thermostable beta-glucosidase that is a laminariobiase. *Microbiology* **143** ( Pt 11), 3537-3542 (1997).
28. B. P. Cormack, N. Ghorri, S. Falkow, An adhesin of the yeast pathogen *Candida glabrata* mediating adherence to human epithelial cells. *Science* **285**, 578-582 (1999).
29. M. Veelders *et al.*, Structural basis of flocculin-mediated social behavior in yeast. *P Natl Acad Sci USA* **107**, 22511-22516 (2010).
30. L. L. Kiessling, Chemistry-driven glycoscience. *Bioorgan Med Chem* **26**, 5229-5238 (2018).
31. M. Ambrosi, N. R. Cameron, B. G. Davis, Lectins: tools for the molecular understanding of the glycode. *Org Biomol Chem* **3**, 1593-1608 (2005).
32. N. Garber, U. Guempel, N. Gilboagarber, R. J. Doyle, Specificity of the Fucose-Binding Lectin of *Pseudomonas-Aeruginosa*. *Fems Microbiol Lett* **48**, 331-334 (1987).
33. R. Loris, D. Tielker, K. E. Jaeger, L. Wyns, Structural basis of carbohydrate recognition by the lectin LecB from *Pseudomonas aeruginosa*. *J Mol Biol* **331**, 861-870 (2003).
34. D. J. Wilbur, C. Williams, A. Allerhand, Detection of the furanose anomers of D-mannose in aqueous solution. Application of carbon-13 nuclear magnetic resonance spectroscopy at 68 MHz. *Journal of the American Chemical Society* **99**, 5450-5452 (1977).
35. K. H. Ueberschar, E. O. Blachnitzky, G. Kurz, Reaction mechanism of D-galactose dehydrogenases from *Pseudomonas saccharophila* and *Pseudomonas fluorescens*. Formation and rearrangement of aldono-1,5-lactones. *Eur J Biochem* **48**, 389-405 (1974).
36. S. J. Angyal, The Composition and Conformation of Sugars in Solution. *ANGEWANDTE CHEMIE INTERNATIONALE EDITION* **8**, 157-226 (1969).
37. C. D. Rillahan, J. C. Paulson, Glycan microarrays for decoding the glycome. *Annu Rev Biochem* **80**, 797-823 (2011).
38. S. J. Lim, W. M. Wan Aida, S. Schiehser, T. Rosenau, S. Bohmdorfer, Structural elucidation of fucoidan from *Cladosiphon okamuranus* (Okinawa mozuku). *Food Chem* **272**, 222-226 (2019).
39. M. T. Ale, A. S. Meyer, Fucoidans from brown seaweeds: an update on structures, extraction techniques and use of enzymes as tools for structural elucidation. *RSC Advances* **3**, 8131-8141 (2013).
40. Z. Li, T. Feizi, The neoglycolipid (NGL) technology-based microarrays and future prospects. *FEBS Lett* **592**, 3976-3991 (2018).
41. S. Vidal-Melgosa *et al.*, A new versatile microarray-based method for high throughput screening of carbohydrate-active enzymes. *J Biol Chem* **290**, 9020-9036 (2015).
42. D. C. Smith, G. F. Steward, R. A. Long, F. Azam, Bacterial mediation of carbon fluxes during a diatom bloom in a mesocosm. *Deep Sea Research Part II: Topical Studies in Oceanography* **42**, 75-97 (1995).
43. I. G. Gwak, W. S. Jung, H. J. Kim, S. H. Kang, E. Jin, Antifreeze Protein in Antarctic Marine Diatom, *Chaetoceros neogracile*. *Mar Biotechnol* **12**, 630-639 (2010).
44. W. Kabsch, Integration, scaling, space-group assignment and post-refinement. *Acta Crystallogr D Biol Crystallogr* **66**, 133-144 (2010).
45. P. Evans, Scaling and assessment of data quality. *Acta Crystallogr D* **62**, 72-82 (2006).
46. J. Beilsten-Edmands *et al.*, Scaling diffraction data in the DIALS software package: algorithms and new approaches for multi-crystal scaling. *Acta Crystallogr D Struct Biol* **76**, 385-399 (2020).
47. A. A. Vagin *et al.*, REFMAC5 dictionary: organization of prior chemical knowledge and guidelines for its use. *Acta Crystallogr D* **60**, 2184-2195 (2004).
48. P. V. Afonine *et al.*, Towards automated crystallographic structure refinement with phenix.refine. *Acta Crystallogr D Biol Crystallogr* **68**, 352-367 (2012).
49. I. Moller *et al.*, High-throughput mapping of cell-wall polymers within and between plants using novel microarrays. *Plant J* **50**, 1118-1128 (2007).

50. J. Heimburg-Molinaro, X. Song, D. F. Smith, R. D. Cummings, Preparation and analysis of glycan microarrays. *Curr Protoc Protein Sci* **Chapter 12**, Unit12 10 (2011).
51. A. Burgess *et al.*, Loss of human Greatwall results in G2 arrest and multiple mitotic defects due to deregulation of the cyclin B-Cdc2/PP2A balance. *P Natl Acad Sci USA* **107**, 12564-12569 (2010).
52. A. M. Krachler, K. Orth, Targeting the bacteria-host interface: Strategies in anti-adhesion therapy. *Virulence* **4**, 284-294 (2013).
53. V. Kalas *et al.*, Structure-based discovery of glycomimetic FmlH ligands as inhibitors of bacterial adhesion during urinary tract infection. *Proc Natl Acad Sci U S A* **115**, E2819-E2828 (2018).

## Figures and Tables

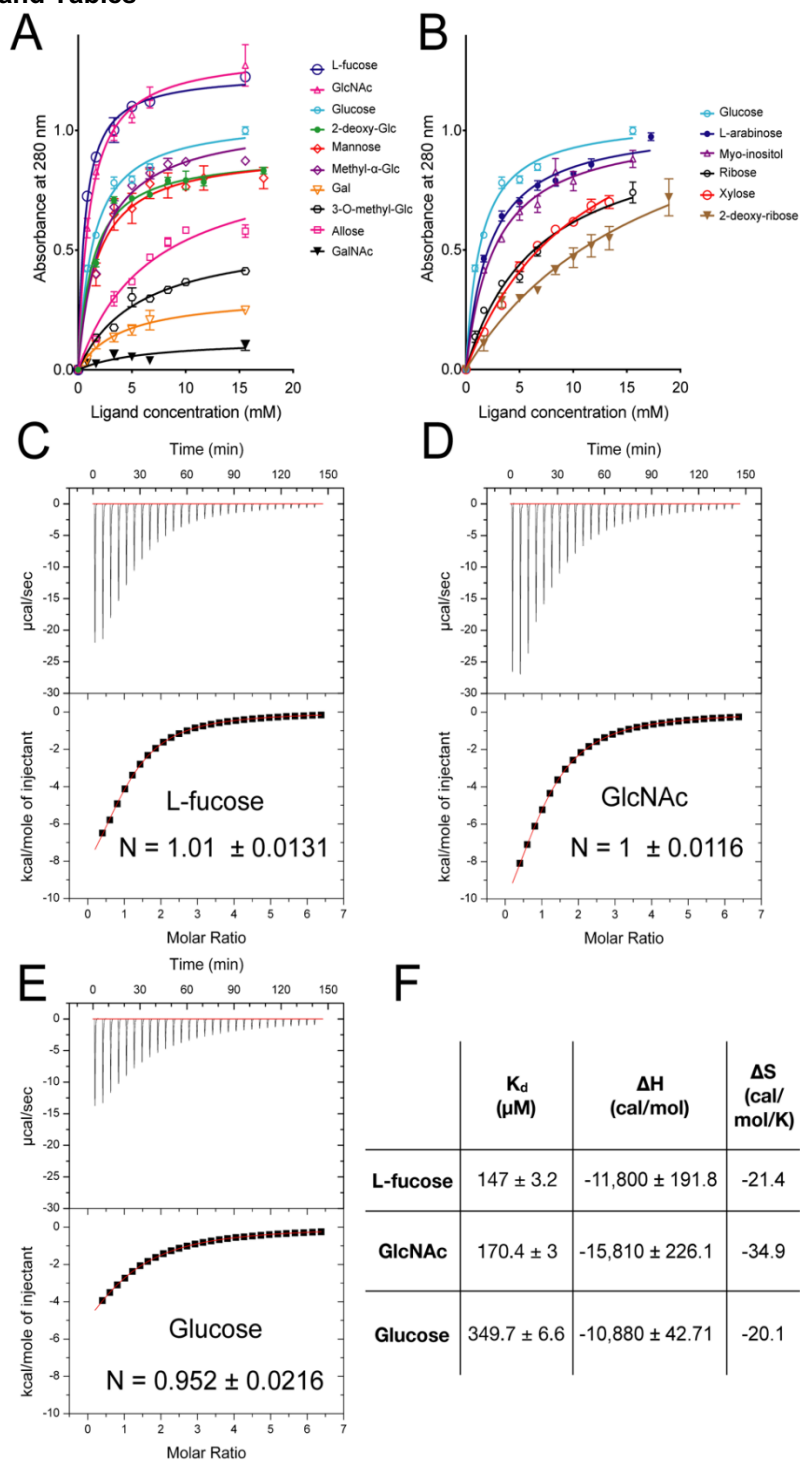

**Figure 1:** Competition binding assay to determine relative affinity of *MpPA14* for simple carbohydrates. A) Dextran-based competition binding assay to determine relative affinity of *MpPA14* for various hexoses and their derivatives. Each experiment was done in triplicate. B) Dextran-based competition binding assay to determine relative affinity of *MpPA14* for selected

pentoses and myo-inositol. Isothermal titration calorimetry of *MpPA14* binding to fucose (C), GlcNAc (D), and glucose (E), respectively. The binding stoichiometry (N) is indicated on each graph. (F) Table of the calculated thermodynamic parameters, including the dissociation constant ( $K_d$ ), enthalpy ( $\Delta H$ ) and entropy ( $\Delta S$ ) for each of the three sugars.



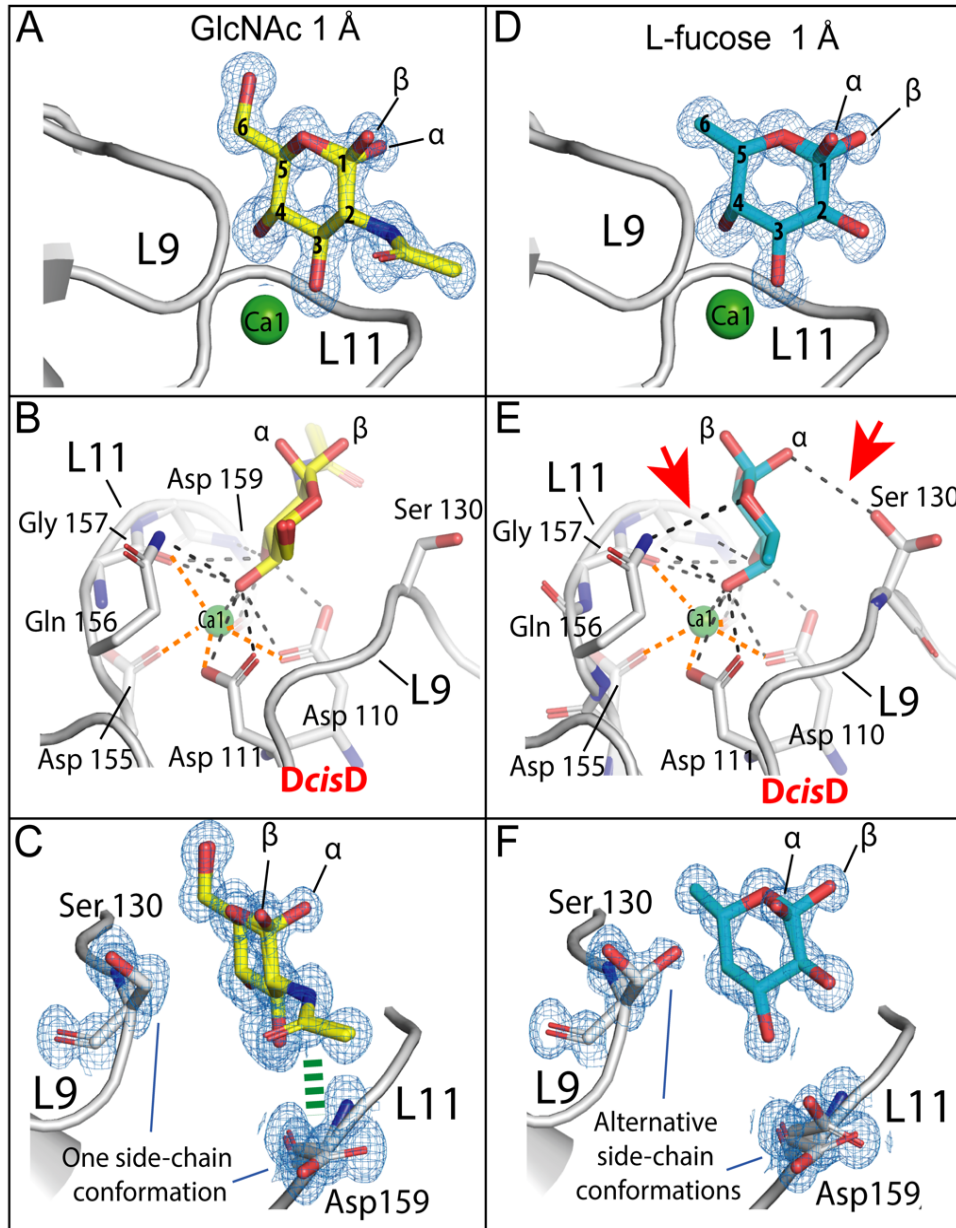

**Figure 2:** Ligand-binding site of *MpPA14* in complex with GlcNAc and L-fucose. Structural features of the *MpPA14* ligand-binding sites with GlcNAc (A) and L-fucose (D). Detailed carbohydrate-protein interactions between *MpPA14* and GlcNAc (B), and L-fucose (E), respectively. Ionic bonds between Ca1 and *MpPA14* are indicated by thicker orange dashed lines, while polar interactions between the lectin and carbohydrates are indicated with black dashed lines. Red arrowheads in (E) indicate the additional polar interactions between L-fucose and *MpPA14* compared to those in (B). (C, F) Angled view comparing the conformations of the side chains of L9-Ser130, and L11-Asp159 in the ligand-binding sites of *MpPA14*-GlcNAc (C) and *MpPA14*-fucose (F) complexes. Carbon atoms of GlcNAc are colored yellow, while those of L-fucose and *MpPA14* are colored cyan and light grey, respectively. The interaction between the acetyl group of GlcNAc and side chain of Asp159 is indicated by a green dashed line. Oxygens are colored red, nitrogens are colored blue and Ca<sup>2+</sup> ions are colored green. The 2F<sub>o</sub> - F<sub>c</sub> maps

shown for sugars and ligand-binding site residues in (A), (C), (D) and (F) are shown as blue meshes (contoured at  $\sigma=1$ ).

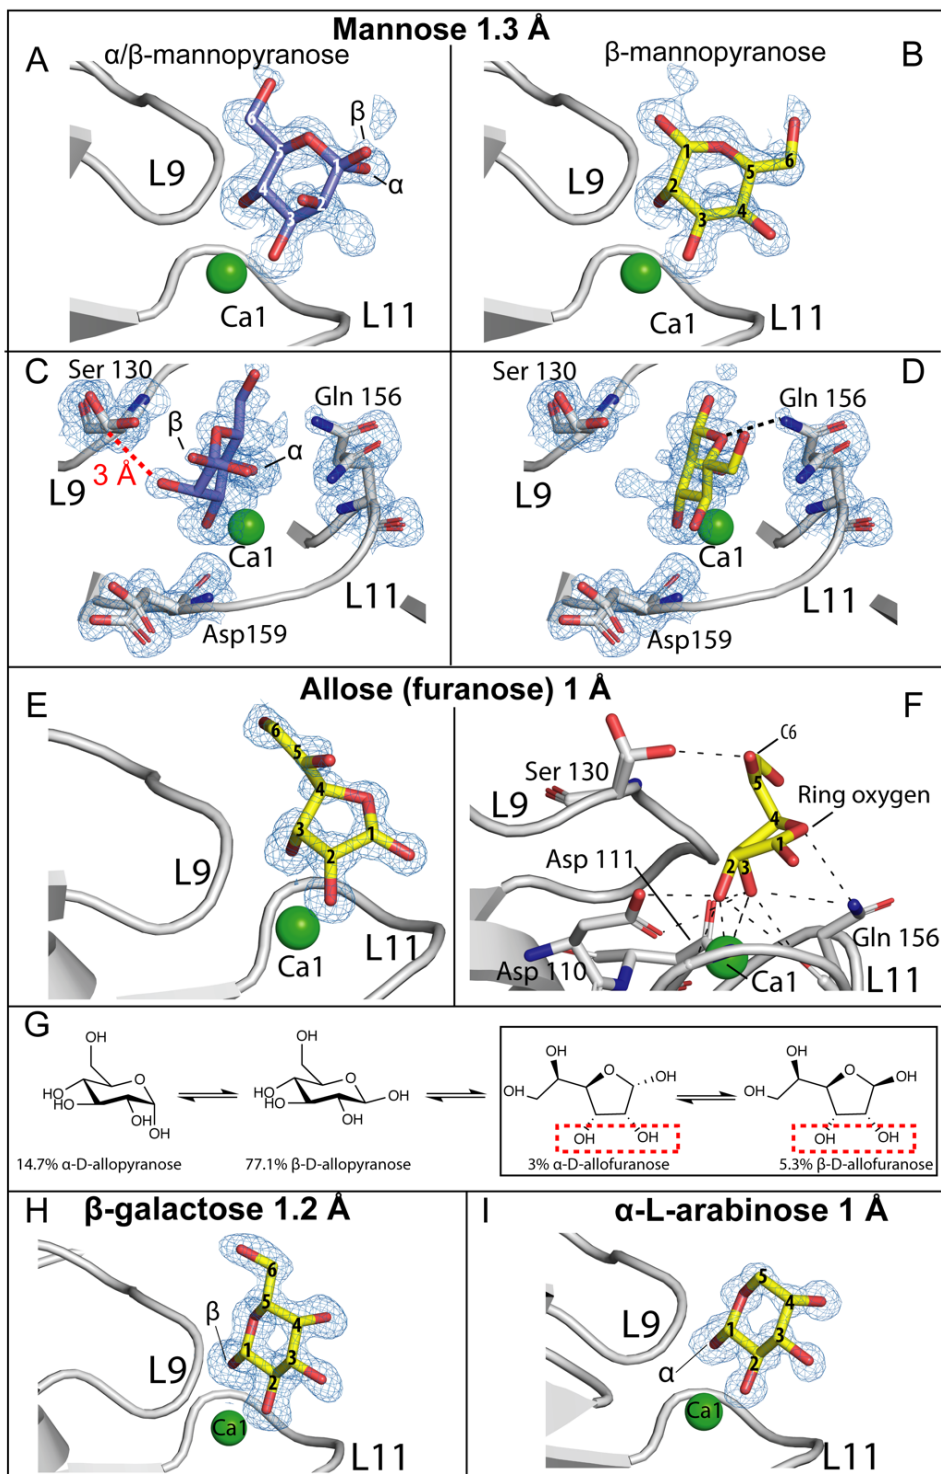

**Figure 3:** Ligand-binding site of *MpPA14* in complex with mannose, allose, galactose and L-arabinose. Side (A) and top views (C) of  $\alpha$ - and  $\beta$ -mannopyranose rings anchored to *MpPA14* via their 3, 4 diols. Electron density for only  $\beta$ -mannopyranose was seen for the binding mode via the 2, 3 diol (side view in B and top-down view in D). The distance between the  $\beta$ -carbon of serine on

L9 and C-2 hydroxyl oxygen of  $\alpha/\beta$ -mannopyranose is indicated by a red dashed line. E) Side-view of  $\beta$ -allofuranose in the *MpPA14* ligand-binding site. F) Detailed polar interactions (black dashed lines) between  $\beta$ -allofuranose and *MpPA14*. Amino-acid residues involved in allose-*MpPA14* interaction are labelled. The color scheme is the same as in Fig.3. (G) Equilibria of allose anomers in aqueous solution at 30 °C. The diol of allofuranose responsible for binding *MpPA14* is indicated by a red-dashed box. Side-view of  $\beta$ -galactose (H) and  $\alpha$ -L-arabinose (I) in the *MpPA14* ligand-binding site.

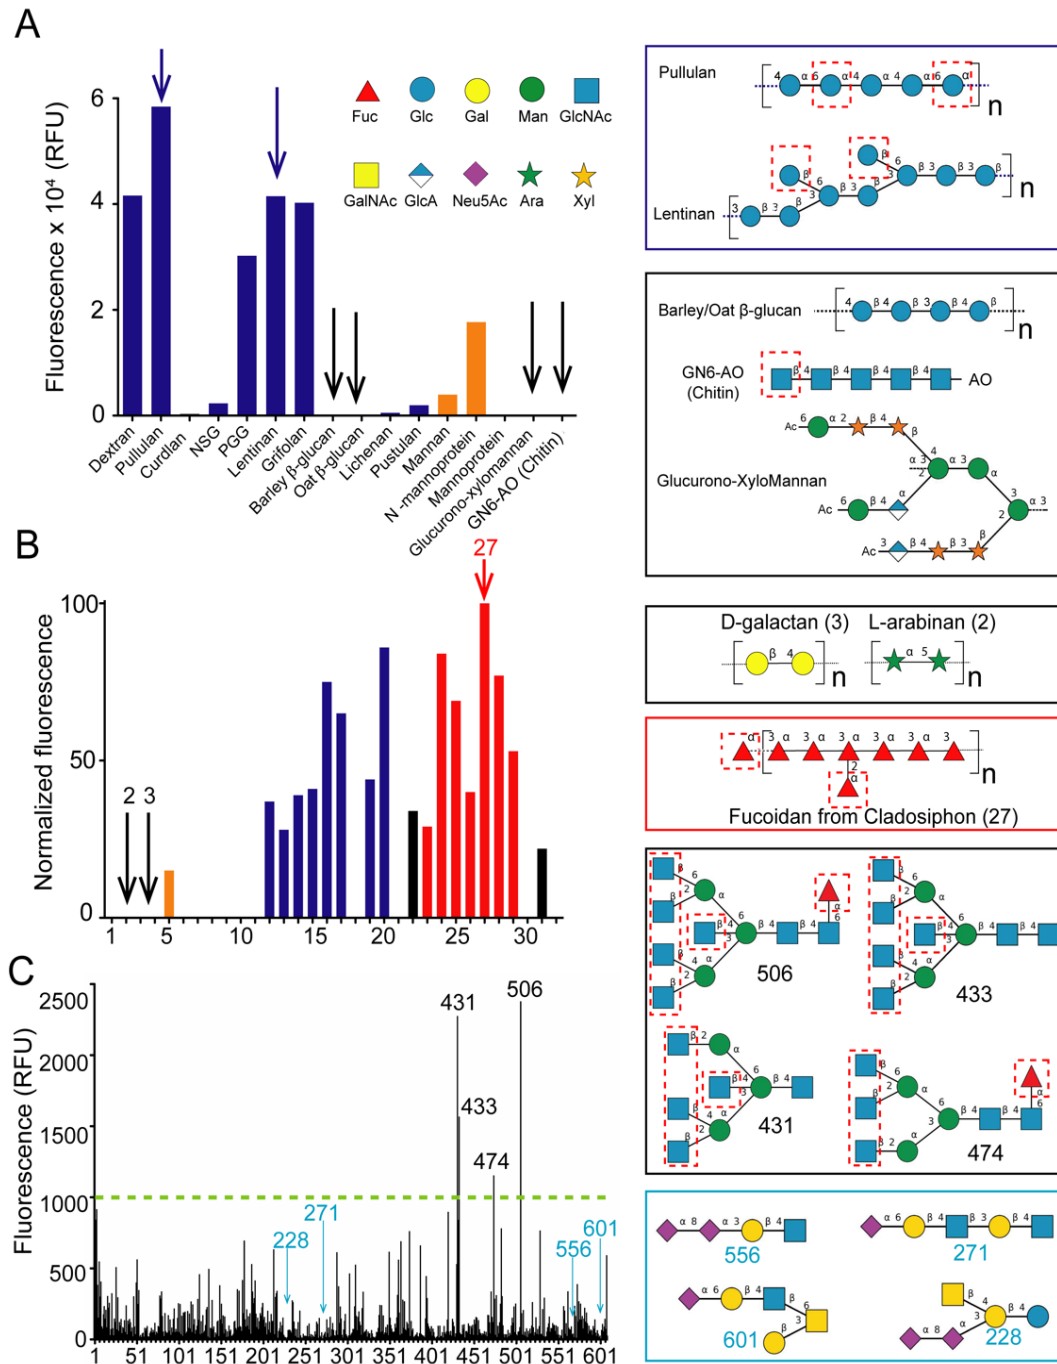

**Figure 4:** Binding of *MpPA14* to sugar oligomers identified by three different glycan microarrays. A) Microbial glycan array analysis conducted at Imperial College Glycosciences Laboratory. Data bars showing binding intensity for glucans and mannans are colored blue and orange, respectively. Examples of strong binders are drawn in the blue box (top right, blue arrows in the graph), while those for weak binders are drawn below (black arrows in the graph). The putative

sites for *MpPA14* binding to the glycans are indicated by dashed red boxes. Glycan nomenclature symbols are included. Abbreviations are as follows: L-fucose, Fuc; Glucose, Glc; Galactose, Gal; Mannose, Man; N-acetyl-glucosamine, GlcNAc; N-acetyl-galactosamine, GalNAc; Glucuronic Acid, GlcA; N-acetyl-Neuraminic acid, Neu5Ac; L-arabinose, Ara; Xylose, Xyl. B) Microarray data of glycans from marine algae and land plants. Glucans (blue), mannans (orange) fucoidans (red), and other types of glycans (black). Examples of non-binders (right, black arrows in the graph), while the structure for *Cladosiphon* fucoidan is shown below (red arrow in the graph). C) Mammalian glycan array analyzed at the Consortium for Functional Glycomics. Representative structures for the strong *MpPA14* binders (black box) and non-binders (blue box) are drawn on the right.

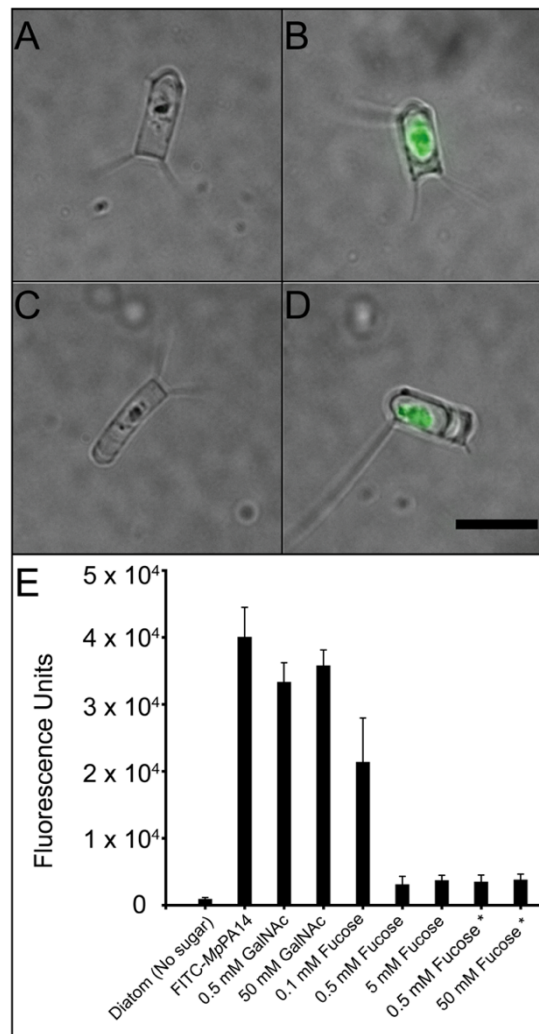

**Figure 5:** Inhibition of *MpPA14* binding to diatom *C. neogracile*. Representative images showing: (A) an untreated *C. neogracile* with basal autofluorescence in the center from its cell; (B) a *C. neogracile* cell treated with 0.2 mg/mL FITC-labelled *MpPA14*; (C) a *C. neogracile* cell treated with 0.5 mM L-fucose and 0.2 mg/mL FITC-labelled *MpPA14*; (D) a *C. neogracile* cell treated with 0.2 mg/mL FITC-labelled *MpPA14* and 50 mM GalNAc. All four images (A) – (D) are at the same scale, with the black scale bar in (D) indicating 10  $\mu$ m (E) Fluorescence levels shown by the *C. neogracile* cells alone and those treated with various ligands. Each bar represents the quantification of average fluorescence from 30 individual diatoms. Data bars with an asterisk underneath represent experiments where diatoms were incubated with FITC-*MpPA14* before L-fucose was added.

**Table 1.** Apparent dissociation constants for the binding of different sugars.

| Sugars                      | $K_{Dapp}$ (mM) |
|-----------------------------|-----------------|
| L-fucose                    | 0.65            |
| N-acetyl-glucosamine        | 1.07            |
| Glucose                     | 1.4             |
| 2-deoxy-glucose             | 1.4             |
| Mannose                     | 1.7             |
| Methyl- $\alpha$ -glucose   | 2.1             |
| L-arabinose                 | 2.2             |
| Inositol                    | 2.7             |
| Galactose                   | 4.1             |
| 3- <i>O</i> -methyl-glucose | 5.7             |
| Allose                      | 6.8             |
| Ribose                      | 6.8             |
| Xylose                      | 11              |
| 2-deoxy-ribose              | 18              |
| N-acetyl-galactosamine      | -               |
